# Supplementary material for: Unheralded contributions of biogenic volatile organic compounds from urban greening to ozone pollution: a high-resolution modeling study
Source: Copernicus journal article supplement (doi:10.5194/egusphere-2024-1163), 2024-06-25
Supplement: Supplementary file 1 [file egusphere-2024-1163-supplement.pdf]

# Unheralded contributions of biogenic volatile organic compounds from urban greening to ozone pollution: a high-resolution modeling study

Haofan Wang<sup>1,2,3,4</sup>, Yuejin Li<sup>1,2,3</sup>, Yiming Liu<sup>1,2,3\*</sup>, Xiao Lu<sup>1,2,3</sup>, Yang Zhang<sup>5</sup>, Qi Fan<sup>1,2,3\*</sup>, Tianhang Zhang<sup>4</sup>, Chong Shen<sup>6</sup>

<sup>1</sup>*School of Atmospheric Sciences, Sun Yat-sen University, and Southern Marine Science and Engineering Guangdong Laboratory (Zhuhai), Zhuhai, 519082, PR China*

<sup>2</sup>*Guangdong Provincial Field Observation and Research Station for Climate Environment and Air Quality Change in the Pearl River Estuary, Guangzhou, 510275, PR China*

<sup>3</sup>*Guangdong Province Key Laboratory for Climate Change and Natural Disaster Studies, Sun Yat-sen University, Zhuhai, PR China*

<sup>4</sup>*Centre for Atmospheric Science, Department of Earth and Environmental Sciences, University of Manchester, Manchester, United Kingdom*

<sup>5</sup>*College of Resources and Environment, Chengdu University of Information Technology, Chengdu, Sichuan, China*

<sup>6</sup>*Guangzhou Climate and Agrometeorology Center, Guangzhou 511430, China*

Correspondence to: Yiming Liu ([liuym88@mail.sysu.edu.cn](mailto:liuym88@mail.sysu.edu.cn)), Qi Fan ([eesfq@mail.sysu.edu.cn](mailto:eesfq@mail.sysu.edu.cn))

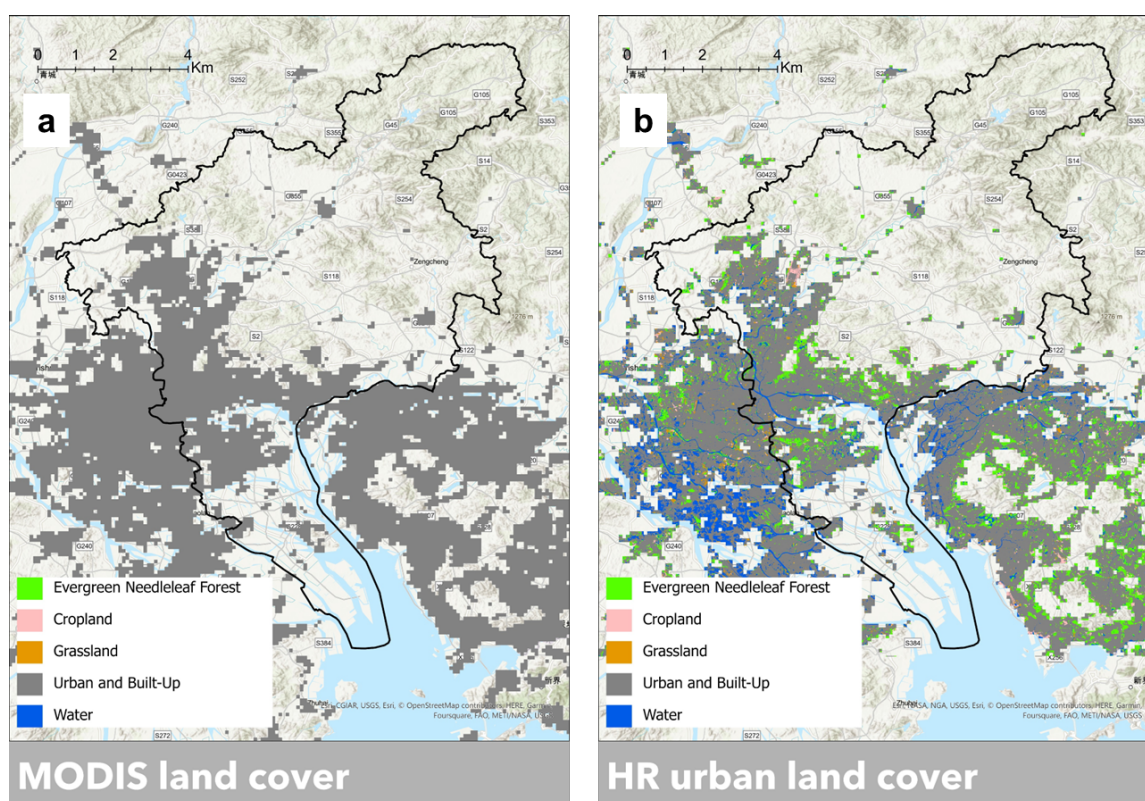

Figure S1 the processed land cover dataset. (a) is the MODIS land cover without UGS and (b) has characterized the UGS base on MODIS land cover.

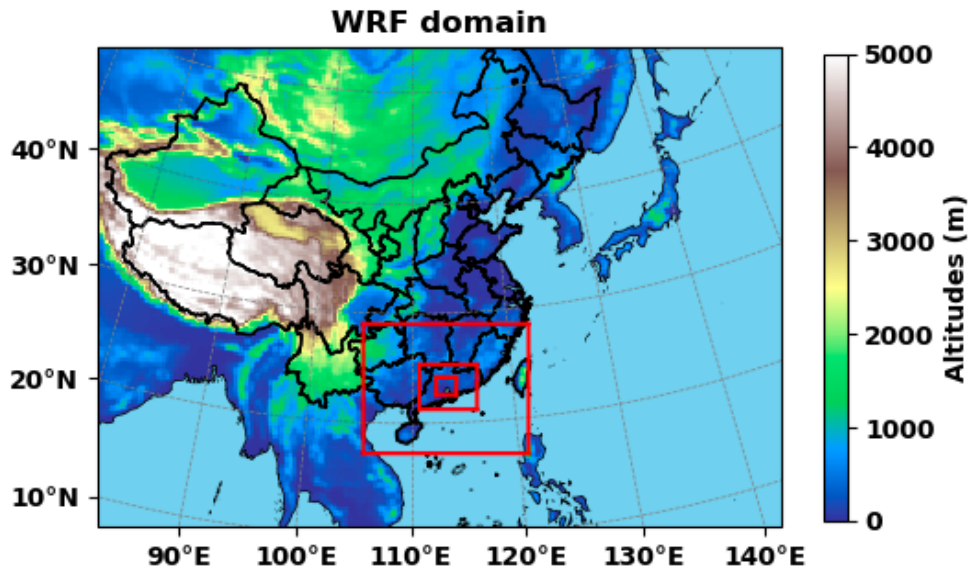

Figure S2 WRF domain nested map with topography.

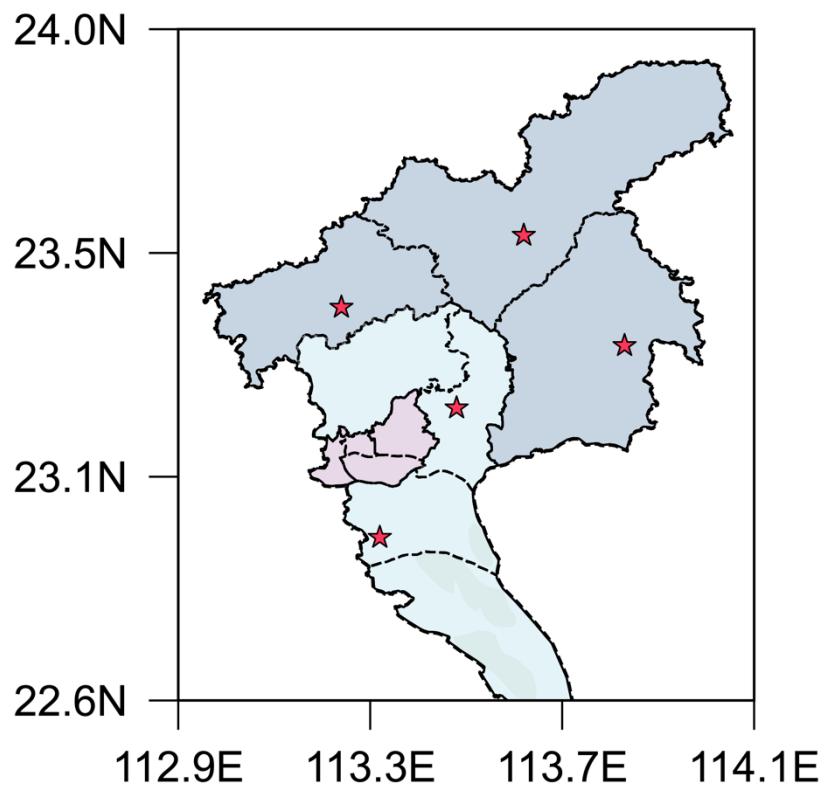

Figure S3 the meteorological station map and various areas.

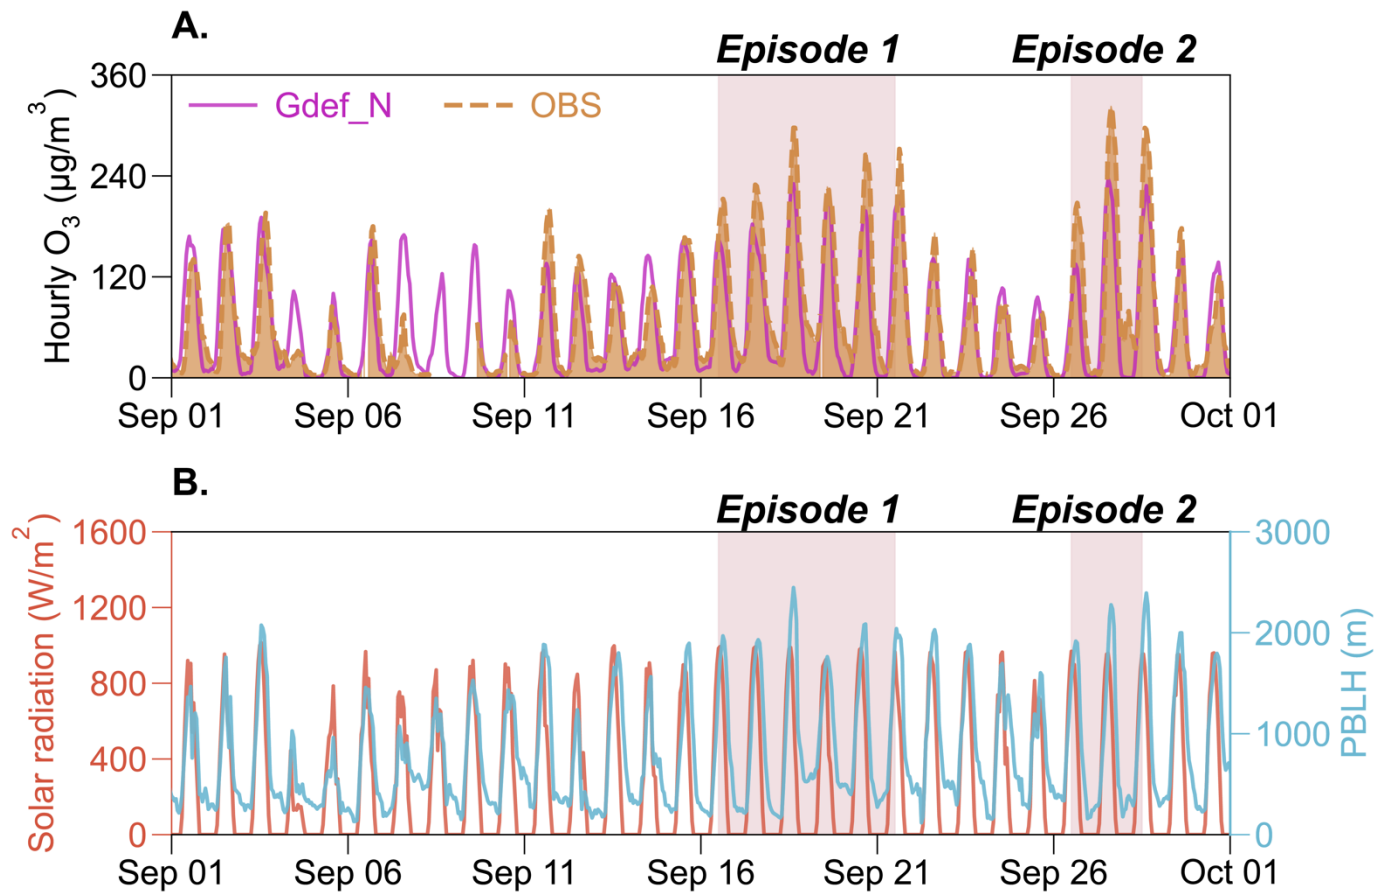

Figure S4 The comparison between the average hourly  $O_3$  values from simulation and observation (A). And the relative grid average values of solar radiation and PBLH (B).

Table S1 the physical parameterizations employed within the WRF.

| Model attribution   | Configuration                                                   |
|---------------------|-----------------------------------------------------------------|
| Microphysics        | Purdue Lin (Chen and Sun, 2002)                                 |
| PBL physics scheme  | MYJ (Janjić, 1994)                                              |
| Shortwave radiation | Goddard (Chou et al., 2001)                                     |
| Longwave radiation  | Rapid Radiative Transfer Model (RRTM) (Mlawer et al., 1997)     |
| Land surface model  | Noah land surface model (LSM) (Ek et al., 2003)                 |
| Urban scheme        | Single-layer urban canopy model (UCM) (Kusaka and Kimura, 2004) |

Table S2 The metrics of meteorological parameters.

|                    | Default land use cover datasets |         |        |      | High-resolution land use cover datasets |         |        |      |
|--------------------|---------------------------------|---------|--------|------|-----------------------------------------|---------|--------|------|
|                    | NME                             | NMB     | MB     | R    | NME                                     | NMB     | MB     | R    |
| Temperature (K)    | 3.15%                           | 2.89%   | 0.76   | 0.82 | 3.15%                                   | 2.88%   | 0.75   | 0.83 |
| Relative humid (%) | 13.01%                          | -12.88% | -10.36 | 0.74 | 13.01%                                  | -12.76% | -10.31 | 0.77 |
| Wind speed (m/s)   | 21.43%                          | 9.30%   | 0.21   | 0.63 | 20.39%                                  | 9.22%   | 0.19   | 0.65 |

**Table S3: The formulas for metrics.**

|     |                                                                                                                                            |
|-----|--------------------------------------------------------------------------------------------------------------------------------------------|
| R   | $\frac{\sum_{i=1}^n (M_i - \bar{M}_i) (O_i - \bar{O}_i)}{\sqrt{\sum_{i=1}^n (M_i - \bar{M}_i)^2} \sqrt{\sum_{i=1}^n (O_i - \bar{O}_i)^2}}$ |
| NMB | $\frac{\sum_{i=1}^n (M_i - O_i)}{\sum_{i=1}^n O_i}$                                                                                        |
| NME | $\frac{\sum_{i=1}^n  M_i - O_i }{\sum_{i=1}^n O_i}$                                                                                        |
| MB  | $\frac{\sum_{i=1}^n (M_i - O_i)}{n}$                                                                                                       |

Where  $M_i$  and  $O_i$  are the simulated and observed data, respectively.  $\bar{M}_i$  and  $\bar{O}_i$  are the average of the simulated and observed data, respectively.  $n$  is the number of samples.

**Table S4 The estimate of the UGS-BVOC emission in Guangzhou city based on high-resolution land use cover (units: Gg)**

| Species        | Abbreviations | Urban (Gg) | Suburban (Gg) | Rural (Gg) | Total (Gg) |
|----------------|---------------|------------|---------------|------------|------------|
| Acetic acid    | AACD          | 0.88       | 2.43          | 1.18       | 4.49       |
| Acetaldehyde   | ALD2          | 3.48       | 11.57         | 5.86       | 20.91      |
| Formaldehyde   | FORM          | 0.94       | 3.90          | 2.18       | 7.02       |
| Methanol       | MEOH          | 12.54      | 41.36         | 20.46      | 74.36      |
| Formic acid    | FACD          | 2.81       | 7.83          | 3.80       | 14.44      |
| Ethane         | ETHA          | 2.14       | 8.40          | 4.65       | 15.19      |
| Ethanol        | ETOH          | 3.64       | 12.13         | 6.13       | 21.90      |
| Acetone        | ACET          | 6.22       | 21.47         | 11.66      | 39.35      |
| Propane        | PRPA          | 2.08       | 8.19          | 4.55       | 14.82      |
| Ethene         | ETH           | 3.95       | 15.60         | 8.67       | 28.22      |
| Isoprene       | ISOP          | 47.57      | 117.00        | 48.10      | 212.67     |
| Monoterpenes   | TERP          | 24.11      | 74.48         | 37.59      | 136.18     |
| Alpha pinene   | APIN          | 11.30      | 29.97         | 13.18      | 54.45      |
| Methane        | ECH4          | 0.04       | 0.14          | 0.08       | 0.26       |
| Sesquiterpenes | SESQ          | 4.31       | 11.88         | 5.95       | 22.14      |
| Total          | Total         | 126.01     | 366.35        | 174.04     | 666.40     |
